# Supplementary material for: Solvent-controlled assembly of supramolecular isomers: 2D (4,4) network, 1D ribbons of ring, and both 2D (4,4) networks and 1D ribbons of rings polycatenated in a 3D array
Source: Royal Society of Chemistry journal article supplement (doi:10.1039/b901780c), 2009-01-01
Supplement: b901780c.pdf [file b901780c.pdf]

# Supporting Materials

## Solvent-controlled assembly of supramolecular isomers: 2D (4,4) network, 1D ribbons of ring, and both 2D (4,4) networks and 1D ribbons of rings polycatenated in a 3D array

Xia Zhu, Xun-Gao Liu, Bao-Long Li,\* and Yong Zhang

### 1. Synthesis of $[\text{Mn}(\text{btb})_2(\text{NCS})_2](\text{CH}_2\text{Cl}_2)$ (**1**), $[\text{Mn}(\text{btb})_2(\text{NCS})_2](\text{CH}_3\text{NO}_2)_2$ (**2**)

A EtOH solution (10 mL) of  $\text{Mn}(\text{NCS})_2$  (0.5 mmol) was layered onto a solution of btb (1.0 mmol) in 10 mL  $\text{CH}_2\text{Cl}_2$ , or  $\text{CH}_3\text{NO}_2$ . The resulting solutions stood for several days to give single crystals **1** and **2**, respectively. The crystals of **1** and **2** lose the included solvent and turn opaque immediately upon removal from the mother liquor, give  $[\text{Mn}(\text{btb})_2(\text{NCS})_2]$  (**1a**) (Yield 42%),  $[\text{Mn}(\text{btb})_2(\text{NCS})_2]$  (**2a**) (Yield 51%), respectively. Anal. calc. for  $\text{C}_{18}\text{H}_{24}\text{MnN}_{14}\text{S}_2$  (**1a** and **2a**) (%) C 38.91, H 4.35, N 35.30; found C 38.76, H 4.21, N 35.18 for **1a** and C 38.73, H 4.34, N 35.24 for **2a**.

### 2. Synthesis of $[2\text{D-Mn}(\text{btb})_2(\text{NCS})_2][1\text{D-Mn}(\text{btb})_2(\text{NCS})_2]$ (**3**)

A EtOH solution (10 mL) of btb (1.0 mmol) was layered onto an aqueous solution (10 mL) of  $\text{Mn}(\text{NCS})_2$  (0.5 mmol). The resulting solutions stood for two weeks to give single crystal **3** (Yield 57). Anal. calc. for  $\text{C}_{36}\text{H}_{48}\text{Mn}_2\text{N}_{28}\text{S}_4$  (%) C 38.91, H 4.35, N 35.30; found C 38.84, H 4.29, N 35.23.

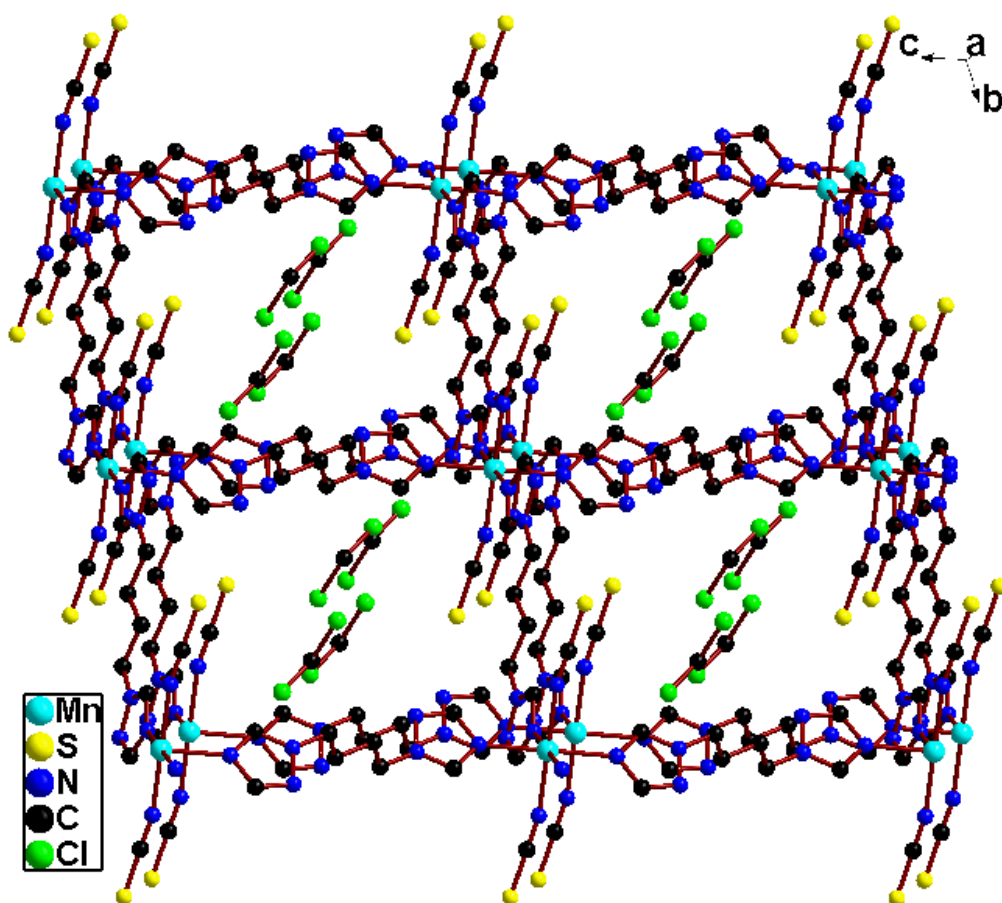

Fig. S1 The packing of two 2D (4,4) networks in 1.

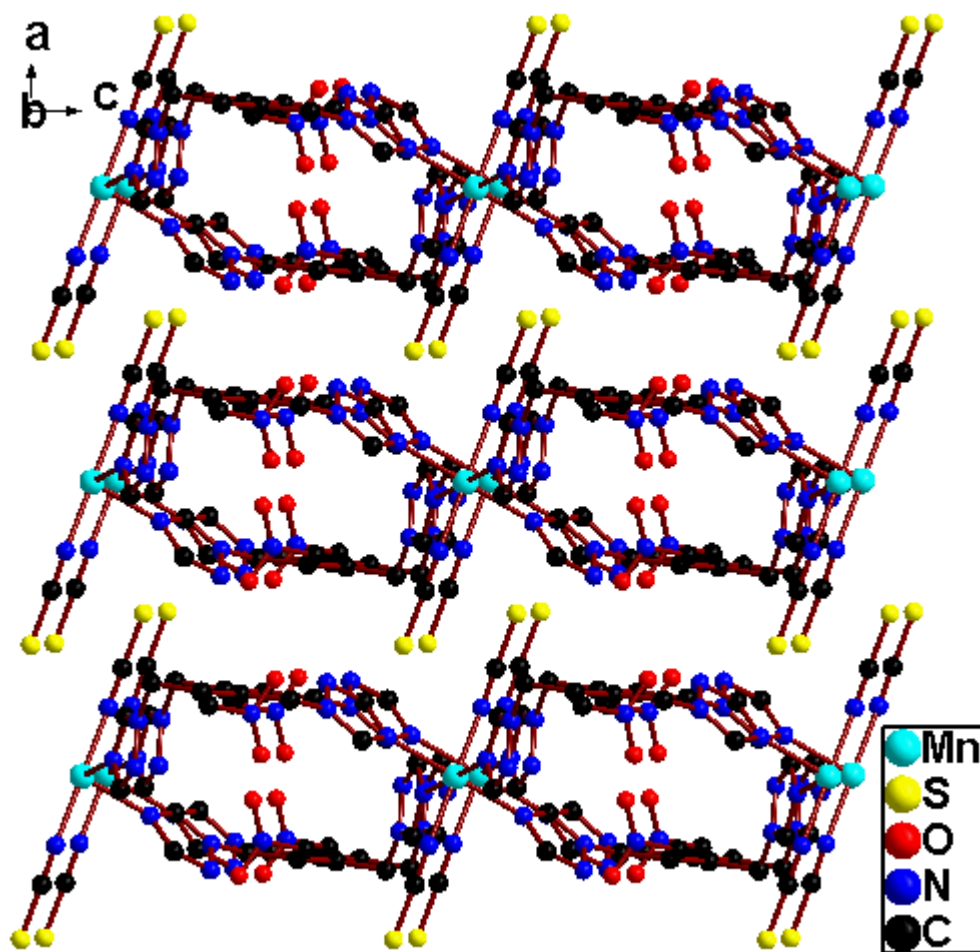

Fig. S2 The packing of the 1D ribbons of rings in 2.

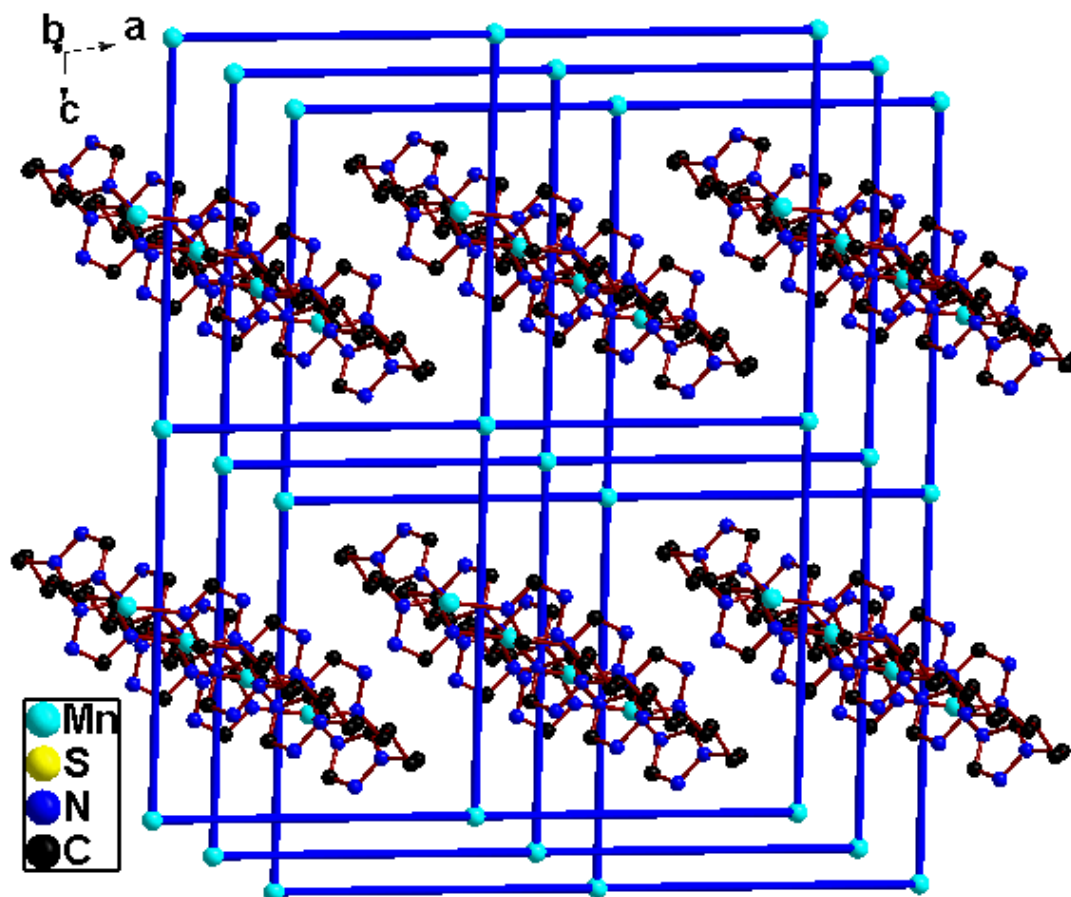

Fig. S3 Schematic view of the overall entanglement of **3**. The btb ligands of planar 2D (4,4) networks are omitted for clarity.

Table S1 The parameters of the btb ligand in **1**, **2** and **3**.

| Complex  | Structure        | Conformation            | Distance of Two donor nitrogen atoms | Torsion                                       |                             |                                               |
|----------|------------------|-------------------------|--------------------------------------|-----------------------------------------------|-----------------------------|-----------------------------------------------|
|          |                  |                         |                                      | $N_{\text{triazole}}-(C-C-C)_{\text{butane}}$ | $(C-C-C-C)_{\text{butane}}$ | $(C-C-C)_{\text{butane}}-N_{\text{triazole}}$ |
| <b>1</b> | (4,4) network    | <i>anti-anti-anti</i>   | 10.020                               | -175.8                                        | 180.00                      | 175.8                                         |
|          |                  |                         | 10.264                               | 179.7                                         | 180.00                      | -179.7                                        |
| <b>2</b> | ribbons of rings | <i>anti-anti-gauche</i> | 7.648                                | 172.2                                         | 172.2                       | 58.8                                          |
| <b>3</b> | (4,4) network    | <i>anti-anti-anti</i>   | 10.572                               | -175.3                                        | 180.00                      | 175.3                                         |
|          |                  |                         | <i>gauche-anti-gauche</i>            | 9.236                                         | -62.2                       | 180.00                                        |
|          | ribbons of rings | <i>anti-anti-gauche</i> | 7.840                                | 169.9                                         | -179.6                      | 68.7                                          |
